1 Full title

2 The association between medical accessibility and glycemic status in patients with  
3 type 2 diabetes mellitus: A retrospective study in Taiwan rural population

4

5 Short title

6 Medical accessibility and glycemic status

7

8 Chong-Fong Sun<sup>1</sup>, Bo-Lin Pan<sup>1</sup>, Pei-Ming Wang<sup>1</sup>, Kun-Siang Huang<sup>1</sup>, Yueh-Chien  
9 Lu<sup>1</sup>, Hsin-Yi Kung<sup>2</sup>, Jui-Chin Chiang<sup>1,\*</sup>

10

11 <sup>1</sup> Department of Family Medicine, Kaohsiung Chang Gung Memorial Hospital,  
12 Kaohsiung City, Taiwan

13 <sup>2</sup> Department of Nursing, Kaohsiung Chang Gung Memorial Hospital, Kaohsiung  
14 City, Taiwan

15 \* Corresponding author

16 Email: [margery@cgmh.org.tw](mailto:margery@cgmh.org.tw) (Jui-Chin Chiang)

17

**NOTE: This preprint reports new research that has not been certified by peer review and should not be used to guide clinical practice.**

## 18 **Abstract**

## 19 **Introduction**

20 Type 2 diabetes mellitus represents a significant chronic health concern, with rural  
21 populations being particularly vulnerable due to geographic and socio-economic  
22 barriers to healthcare access. To date, few studies have focused on the medical  
23 accessibility of rural diabetic patients in Taiwan. This study aims to explore the  
24 association between the proximity to healthcare facilities and glycohemoglobin levels  
25 in the rural Taiwanese population.

## 26 **Methods**

27 We conducted a retrospective cross-sectional study in rural districts of southern  
28 Taiwan. Medical accessibility was calculated from subject's address to medical units  
29 by Google Maps platform. Spearman's Rank Analysis was performed for the  
30 correlation between distance from patient's address to medical units and  
31 glycohemoglobin level. Logistic regression was applied to identify factors associated  
32 with glycemic control.

## 33 **Results**

34 In total, 117 patients with type 2 diabetes mellitus were enrolled (mean  
35 glycohemoglobin:  $8.17 \pm 1.92\%$ ). Glycohemoglobin level was modestly and positively  
36 associated with distance to clinic (Rho: 0.252) and hospital (Rho: 0.241) respectively.  
37 In logistic regression analysis, good glycemic control (glycohemoglobin less than 7%)  
38 was associated with covariates as not-working status, the address district near  
39 downtown, fasting plasma glucose equal to or less than 130 mg/dL, and normal high-  
40 density lipoprotein cholesterol level.

## 41 **Conclusion**

42 Our study reveals that accessibility to healthcare facility is modestly correlated with  
43 long-term glycemic status in Taiwan rural diabetic population. Besides, we also  
44 identified several protective factors associated with chronic glycemic status. These  
45 findings may pave the way for improvement of policy and healthcare strategies in  
46 rural diabetic care.

47

48

49

50

51

52

## 53 **Introduction**

54 Type 2 Diabetes Mellitus (T2DM) is the predominant form of diabetes worldwide,  
55 comprising approximately 90% of all cases. According to the 10th edition of the  
56 International Diabetes Federation Atlas, the global diabetic population is projected to  
57 reach 783.2 million by 2045, marking an increase of nearly 50% from the estimates  
58 made in 2019[1]. The prevalence of diabetes mellitus in Taiwan aligns with this  
59 global upward trend. Data from a retrospective longitudinal cohort study using the  
60 Taiwan National Health Insurance Research Database indicated a 66% increase in the  
61 diabetic population from 2005 to 2014[2]. T2DM is defined by chronic  
62 hyperglycemia, which can silently damage multiple organs. If not properly managed,  
63 T2DM can lead to severe complications such as stroke, blindness, and amputation of  
64 lower extremities, thereby disabling individuals and imposing significant economic  
65 and healthcare burdens. Bommer, C. et al. highlighted that global healthcare  
66 expenditures for diabetes among individuals aged 20-79 increased from USD 232  
67 billion in 2007 to USD 966 billion in 2021[3]. In Taiwan, the frequency of outpatient  
68 visits by T2DM patients is roughly double that of the average patient[4]. Patients with  
69 diabetic complications also tend to have more emergency room visits and  
70 hospitalizations, which result in higher and rising costs under Taiwan's National  
71 Health Insurance program[4, 5].

72

73 Effective prevention of diabetic complications hinges on self-care and regular medical  
74 check-ups, considered as the foundation of diabetes management[1, 6]. However, it is  
75 challenging for rural T2DM patients to access continuous diabetic care due to  
76 geographical and financial barriers. Dugani, S. B. et al. reported that rural populations  
77 in the United States have a higher prevalence of T2DM and diabetic hospital mortality  
78 rates-16% and 20%, respectively-compared to urban populations[7]. Similarly, an  
79 observational study in rural China found that nearly 60% of diabetics were unaware of  
80 their health condition, and 40% of those diagnosed with T2DM were not receiving  
81 treatment[8]. These factors contribute to the higher incidence of diabetes-related  
82 complications among rural populations. In Taiwan, national database studies have  
83 shown that rural T2DM patients are more likely to develop ischemic heart disease,  
84 lower limb ulcers, stroke, congestive heart failure, end-stage renal disease, and  
85 blindness[5]. Additionally, delayed detection of diabetic neuropathy and an  
86 approximately 50% higher prevalence of lower limb amputations were reported[9,  
87 10]. Rural T2DM patients also have a higher risk of preventable hospitalizations  
88 compared to their urban counterparts[11].

89

90 Considering the rural-urban disparities, recent studies have explored the impact of

91 distance to healthcare facilities on diabetes management[12-16]. Nevertheless, to our  
92 knowledge, no study has specifically addressed this issue in Taiwan. This study aims  
93 to illuminate the relationship between geographic accessibility and long-term  
94 glycemic control, and to identify protective factors that promote good glycemic  
95 management in Taiwan's rural diabetic population.

96

## 97 **Methods**

### 98 **Study design and subjects**

99 We conducted a retrospective, cross-sectional study in two rural districts, Jia-Sian and  
100 Shan-Lin, in southern Taiwan, spanning from January 2009 to December 2022. The  
101 study participants were selected from those using the outpatient service of the Mobile  
102 Health Care program. This public program, initiated by the Taiwanese government's  
103 Ministry of Health and Welfare in 2002, aims to mitigate urban-rural health  
104 disparities. It mobilizes medical teams from urban medical centers to provide daily  
105 outpatient care, perform routine blood tests, and prescribe medications at public  
106 venues like temples or community centers. During the study period, a total of 3,082  
107 individuals utilized this outpatient service. After verifying their T2DM diagnoses and  
108 excluding those with unavailable addresses, 117 subjects were finally included in this  
109 study (Fig. 1). The Chang Gung Medical Foundation's Institutional Review Board

110 approved this study (IRB No. 202301135B0).

111

112 **Fig 1. Flow chart of subject inclusion in this study.**

113 Abbreviations: T2DM, Type 2 diabetes mellitus; HbA1c, glycohemoglobin

114

## 115 **Data collection and laboratory methods**

116 We started to retrospectively access patients' data after improvement of the Chang

117 Gung Medical Foundation's Institutional Review Board on September 1<sup>st</sup>, 2023.

118 Medical records and laboratory data for the study were extracted from the database of

119 Kaohsiung Chang Gung Memorial Hospital, which the urban medical team belonged

120 to. Patient profiles were compiled from the initial visit forms filled out by patients

121 with the help of medical staff. Venous blood samples were collected from patients

122 following a minimum of 8 hours of overnight fasting. Fasting plasma glucose level

123 was measured by enzymatic method. Total cholesterol (TC), high-density lipoprotein

124 cholesterol (HDL-C), and triglyceride (TG) were measured by colorimetric method.

125 Low-density lipoprotein cholesterol (LDL-C) level was calculated by Friedewald

126 Formula ( $LDL-C = TC - HDL-C - TG/5$ ). HbA1c level was quantified through High

127 Performance Liquid Chromatography (HPLC), and proteinuria was assessed by using

128 a urine test that employs reflective photometry. During data collection and analysis,

129 all subjects' data were de-identified. The author responsible for collecting addresses

130 and processing related data handled this personal information independently, and he

131 did not have access to other patients' data.

132

### 133 **Definition of T2DM**

134 T2DM was defined according to diagnostic criteria outlined by Diabetes Care

135 2023[17]. The criteria include: (1) a patient with classic symptoms of hyperglycemia

136 and a random plasma glucose  $\geq 200$  mg/dL, or (2) a patient has at least two records of

137 fasting plasma glucose  $\geq 126$  mg/dL or (3) HbA1c  $\geq 6.5\%$ . Additionally, subjects who

138 had been diagnosed with T2DM or who were taking anti-diabetic medications were

139 also considered as having T2DM.

140

### 141 **Variables**

142 In this study, we measured geographic accessibility to diabetic care by calculating the

143 distance from a patient's residence to the nearest medical facility, such as a hospital or

144 clinic, using the Google Maps platform. HbA1c was employed as the surrogate of

145 long-term glycemetic status. To mitigate potential confounding effects from the medical

146 services provided by the urban medical team of the Mobile Health Care program, we

147 considered only HbA1c values obtained within three months before or after the

148 patient's initial visit. HbA1c levels were categorized into two groups: "good control,"

149 defined as levels below 7%, and "poor control," defined as levels equal to or



150 exceeding 7%.

151

## 152 **Covariates**

153 We categorized other variables into general data, past history, and laboratory data.

154 General data included: (1) age, grouped as under 65 or 65 and older; (2) gender,  
155 classified as male or female; (3) employment status, either employed or not working;  
156 (4) education level, categorized as unschooled, elementary school, junior high school,  
157 or senior high school and above; (5) district, either Jia-Sian or Shan-Lin; (6) lifestyle  
158 factors, including current smoking, drinking, and betelnut use. Past history contained  
159 cardiovascular diseases, hypertension, chronic hepatitis, stroke, chronic kidney  
160 disease, malignancy, and surgical interventions. Laboratory data comprised fasting  
161 plasma glucose, lipid profiles (total cholesterol, LDL-C, HDL-C, and triglycerides),  
162 and proteinuria. Fasting plasma glucose levels of 130 mg/dL or lower, HDL-C levels  
163 of 40 mg/dL or higher in men and 50 mg/dL or higher in women, and triglyceride  
164 levels below 150 mg/dL were defined as “good control” following the  
165 recommendations from Diabetes Care 2023[17]. Total cholesterol levels below 160  
166 mg/dL and LDL-C levels under 100 mg/dL were also considered “good control”  
167 based on the suggestion from the Diabetes Association of the Republic of China  
168 (Taiwan) [18]. Proteinuria was classified as positive (ranging from 1+ to 4+) or

169 negative (trace and negative).

170

## 171 **Statistical analysis**

172 General characteristics of subjects were presented by means and standard deviations

173 (SD) for continuous variables and percentages for categorical variables. To explore

174 the relationship between HbA1c levels and geographic distance to medical facilities,

175 Spearman's rank correlation test was employed. Chi-Square test of independence and

176 Fisher's exact test were used for categorical variables, depending on the expected

177 numbers in classes. Logistic regression was utilized to estimate the odds ratio of

178 categorical variables. All statistical analyses were conducted by using IBM SPSS

179 software, version 22.0. All tests were two-sided, and *p*-values less than 0.05 were

180 considered statistically significant.

181

## 182 **Result**

### 183 **General characteristics**

184 As presented in Table 1, the study population predominantly consisted of midlife to

185 elderly adults, with an average age of 64.79 ( $\pm 11.20$ ) years. Approximately 60% of

186 the participants were female. The majority of subjects had a relatively low level of

187 education, with 73.4% attaining primary school education or less. Regarding

188 residential districts, a higher proportion of patients (63.2%) resided in the Shan-Lin  
189 district. Among past medical histories, hypertension emerged as the most prevalent  
190 disease, affecting 76.1% of the subjects. Cardiovascular and chronic kidney diseases  
191 were the next most common conditions, occupying 27.4% and 15.4% of the  
192 participants, respectively.  
193

**Table 1. General characteristics**

| Characteristics                   | Categories                | All(n%)           |
|-----------------------------------|---------------------------|-------------------|
| Total                             |                           | 117(100.0)        |
| General data                      |                           |                   |
| Age(years)                        | Mean $\pm$ SD             | 64.79 $\pm$ 11.20 |
|                                   | $\geq 65$                 | 54(46.2)          |
| Sex                               | Female                    | 70(59.9)          |
| Education level                   | Unschooling               | 39(33.3)          |
|                                   | $\leq$ Primary school     | 47(40.1)          |
|                                   | $\leq$ Junior high school | 20(17.1)          |
|                                   | $\geq$ Senior high school | 11(9.4)           |
| Employed status                   | Working                   | 81(69.2)          |
| District                          | Jia-Sian                  | 43(36.8)          |
|                                   | Shan-Lin                  | 74(63.2)          |
| Distance to nearest clinic (km)   | Mean $\pm$ SD             | 4.26 $\pm$ 3.71   |
| Distance to nearest hospital (km) | Mean $\pm$ SD             | 21.68 $\pm$ 10.90 |
| Current smoking                   | Yes                       | 24(20.5)          |
| Current drinking                  | Yes                       | 21(17.9)          |

|                                |                   |              |
|--------------------------------|-------------------|--------------|
| Current betelnut using         | Yes               | 9(7.7)       |
| <hr/>                          |                   |              |
| Past history                   |                   |              |
| Cardiovascular diseases        | Yes               | 32(27.4)     |
| Hypertension                   | Yes               | 89(76.1)     |
| Chronic hepatitis              | Yes               | 11(9.4)      |
| Stroke                         | Yes               | 9(7.7)       |
| Chronic kidney disease         | Yes               | 18(15.4)     |
| Malignancy                     | Yes               | 4(3.4)       |
| Surgical intervention          | Yes               | 60(51.3)     |
| <hr/>                          |                   |              |
| Laboratory data                |                   |              |
| Fasting plasma glucose (mg/dL) | Mean ± SD         | 150.67±50.77 |
|                                | ≤ 130             | 45(38.5)     |
|                                | >130              | 58(49.6)     |
| HbA1c (%)                      | Mean ± SD         | 8.17±1.92    |
|                                | < 7               | 36(30.8)     |
|                                | ≥ 7               | 81(69.2)     |
| Total cholesterol (mg/dL)      | Mean ± SD         | 200.45±49.02 |
|                                | < 160             | 24(20.5)     |
|                                | ≥ 160             | 86(73.5)     |
| LDL-C (mg/dL)                  | Mean ± SD         | 107.12±38.56 |
|                                | < 100             | 41(35.0)     |
|                                | ≥ 100             | 57(48.7)     |
| HDL-C (mg/dL) in total         | Goal-achieved     | 61(52.1)     |
|                                | Not goal-achieved | 38(32.5)     |
| HDL-C (mg/dL) in men           | Mean ± SD         | 48.07±14.09  |
|                                | ≥ 40              | 29(24.8)     |

|                        |           |               |
|------------------------|-----------|---------------|
|                        | < 40      | 14(12.0)      |
| HDL-C (mg/dL) in women | Mean ± SD | 54.93±13.77   |
|                        | ≥ 50      | 38(32.5)      |
|                        | < 50      | 18(15.4)      |
| TG (mg/dL)             | Mean ± SD | 221.51±249.68 |
|                        | < 150     | 48(41.0)      |
|                        | ≥ 150     | 59(50.4)      |
| Proteinuria            | No        | 75(64.1)      |
|                        | Yes       | 30(25.6)      |

Abbreviations: HbA1c, glycohemoglobin; SD, standard deviation; LDL-C, low-density lipoprotein cholesterol; HDL, high-density lipoprotein cholesterol; TG, triglyceride

194

## 195 **Glycemic status and geographic accessibility**

196 The overall mean HbA1c level among the subjects was 8.17% (±1.92), with  
 197 approximately 70% of the T2DM patients in this study categorized within the “poor  
 198 control” group (HbA1c ≥ 7%). The average distance from the patient's residence to  
 199 the nearest clinic was 4.26 kilometers (±3.71), and to the nearest hospital was 21.68  
 200 kilometers (±10.90). According to Spearman’s rank correlation test, as shown in  
 201 Table 2, there was a modest correlation between the distance to both the hospital or  
 202 clinic and the HbA1c levels, suggesting that greater geographic distances to medical  
 203 facilities may be associated with poorer glycemic control.

204

### **Table 2. Result of Spearman's Rank Correlation Analysis**

|                                  | Correlation coefficient (Rho) | <i>p</i> -value |
|----------------------------------|-------------------------------|-----------------|
| Distance to the nearest clinic   | 0.252                         | 0.006*          |
| Distance to the nearest hospital | 0.241                         | 0.009*          |

\**p* < 0.05

205

## 206 **Glycemic control and categoric variables**

207 As presented in Table 3, good glycemic control was significantly associated with

208 several covariates, including employment status (*p* = 0.010), residential district (*p* =

209 0.010), control of fasting plasma glucose (*p* = 0.003), triglyceride levels (*p* = 0.049),

210 and high-density lipoprotein cholesterol levels (*p* = 0.020). We further applied logistic

211 regression to assess the influence of these factors on glycemic control, with the

212 findings presented in Table 4. Both of univariate and multivariate analysis indicated

213 that unemployment, residing in the Shan-Lin district, achieving target fasting plasma

214 glucose levels, and maintaining optimal HDL-C levels were factors statistically

215 associated with good glycemic control.

216

**Table 3. Results of Chi-square test or Fisher's exact test for glycemic control and categorical variables**

| Characteristics | Categories | HbA1c < 7% (n) | HbA1c ≥ 7% (n) | <i>p</i> -value |
|-----------------|------------|----------------|----------------|-----------------|
| General data    |            |                |                |                 |
| Age(years)      | <65        | 15             | 48             | 0.078           |
|                 | ≥65        | 21             | 33             |                 |
| Sex             | Male       | 15             | 32             | 0.826           |
|                 | Female     | 21             | 49             |                 |

|                         |                     |    |    |        |
|-------------------------|---------------------|----|----|--------|
| Education level         | Unschool            | 11 | 28 | 0.451  |
|                         | ≤Primary school     | 12 | 35 |        |
|                         | ≤Junior high school | 8  | 12 |        |
|                         | ≥Senior high school | 5  | 6  |        |
| Employed status         | Not working         | 17 | 19 | 0.010* |
|                         | Working             | 19 | 62 |        |
| Address district        | Jia-Sian            | 7  | 36 | 0.010* |
|                         | Shan-Lin            | 29 | 45 |        |
| Current smoking         | No                  | 27 | 66 | 0.423  |
|                         | Yes                 | 9  | 15 |        |
| Current drinking        | No                  | 29 | 67 | 0.799  |
|                         | Yes                 | 7  | 14 |        |
| Betelnut using          | No                  | 32 | 76 | 0.454  |
|                         | Yes                 | 4  | 5  |        |
| <hr/>                   |                     |    |    |        |
| Past history            |                     |    |    |        |
| Cardiovascular diseases | No                  | 25 | 60 | 0.604  |
|                         | Yes                 | 11 | 21 |        |
| Hypertension            | No                  | 11 | 16 | 0.213  |
|                         | Yes                 | 25 | 64 |        |
| Chronic hepatitis       | No                  | 33 | 73 | 1.000  |
|                         | Yes                 | 3  | 8  |        |
| Stroke                  | No                  | 32 | 76 | 0.454  |
|                         | Yes                 | 4  | 5  |        |
| Chronic kidney disease  | No                  | 27 | 72 | 0.055  |
|                         | Yes                 | 9  | 9  |        |

|                                |                   |    |    |        |
|--------------------------------|-------------------|----|----|--------|
| Malignancy                     | No                | 36 | 77 | 0.310  |
|                                | Yes               | 0  | 4  |        |
| Surgical intervention          | No                | 16 | 40 | 0.580  |
|                                | Yes               | 20 | 40 |        |
| Laboratory data                |                   |    |    |        |
| Fasting plasma glucose (mg/dL) | ≤ 130             | 20 | 25 | 0.003* |
|                                | > 130             | 10 | 48 |        |
| Total cholesterol (mg/dL)      | < 160             | 5  | 19 | 0.447  |
|                                | ≥ 160             | 27 | 59 |        |
| LDL-C (mg/dL)                  | < 100             | 13 | 28 | 0.727  |
|                                | ≥ 100             | 20 | 37 |        |
| HDL-C (mg/dL) in total         | Goal-achieved     | 23 | 38 | 0.020* |
|                                | Not goal-achieved | 6  | 32 |        |
| HDL-C (mg/dL) in men           | ≥ 40              | 9  | 20 | 1.000  |
|                                | < 40              | 5  | 9  |        |
| HDL-C (mg/dL) in women         | ≥ 50              | 14 | 24 | 0.021* |
|                                | < 50              | 1  | 17 |        |
| TG (mg/dL)                     | < 150             | 18 | 30 | 0.049* |
|                                | ≥ 150             | 12 | 47 |        |
| Proteinuria                    | No                | 25 | 50 | 0.315  |
|                                | Yes               | 7  | 23 |        |

Abbreviations: HbA1c, glycohemoglobin; SD, standard deviation; LDL-C, low-density lipoprotein cholesterol; HDL, high-density lipoprotein cholesterol; TG, triglyceride

\* $p < 0.05$

**Table 4. Logistic regression of variables associated with good control of HbA1c**



| Variables                      | Categories                 | OR <sup>1</sup> (95% CI) | aOR <sup>2</sup> (95% CI) |
|--------------------------------|----------------------------|--------------------------|---------------------------|
| Employed status                | Not working                | 0.34* (0.15-0.79)        | 0.30* (0.11-0.79)         |
| District                       | Shan-Lin                   | 0.30* (0.12-0.77)        | 0.26* (0.10-0.69)         |
| Fasting plasma glucose (mg/dL) | ≤ 130                      | 0.26* (0.11-0.64)        | 0.23*(0.09-0.60)          |
| HDL-C (mg/dL)                  | Goal-achieved <sup>3</sup> | 0.31* (0.11- 0.85)       | 0.29*(0.10-0.83)          |
| TG (mg/dL)                     | < 150                      | 0.43 (0.18-1.01)         | 0.51 (0.20-1.28)          |

1. Odds ratio of univariate logistic regression.

2. Odds ratio adjusted with age, sex, and education level.

3. Goal of HDL-C in men, 40 mg/dL; women, 50 mg/dL

Abbreviations: HbA1c, glycohemoglobin; HDL, high-density lipoprotein cholesterol; TG, triglyceride; OR, odds ratio; aOR, adjusted odds ratio; CI, confidence interval

\* $p < 0.05$

218

## 219 Discussion

220 The primary objective of this study is to uncover the relationship between geographic  
 221 accessibility and long-term glycemic status among rural Taiwanese populations with  
 222 type 2 diabetes mellitus. Our findings, as manifested in Table 2, reveal a modest but  
 223 positive correlation between the distance from a patient's residence to both primary  
 224 (clinic) and secondary (hospital) healthcare facilities and HbA1c level. This  
 225 extrapolates that rural T2DM patients residing further from medical units are more  
 226 likely to experience chronic hyperglycemia. This observation may help explain the  
 227 higher rates of diabetic complications and the risk of avoidable hospitalizations noted  
 228 in previous Taiwanese rural studies[9-11]. The influence of geographical location on

229 glycemic control corroborates findings from studies in other countries. In the United  
230 States, Strauss, K. et al. observed that rural diabetics with longer driving distances  
231 from home to primary care providers tended to exhibit poor glycemic control[16].  
232 Similarly, in a Pennsylvanian study, Zgibor, J. C. et al. found that T2DM patients  
233 living within 10 miles of a medical center were 2.5 times more likely to have lower  
234 HbA1c levels between first and last office visits[19]. However, a Japanese rural study  
235 reported inconsistent spatial effects in different medical units of reference. According  
236 to R. Fukuoka et al., HbA1c level was found to be associated with distance to  
237 secondary medical facilities rather than primary ones[13]. In the author's opinion, the  
238 discrepancy is possibly related to patients' preference on specialized doctor in larger  
239 hospitals. Interestingly, in our study, distance to the nearest clinic and hospital share  
240 similar correlation coefficient (Rho: 0.252 versus 0.241), despite a notable difference  
241 in average distances (4.26 km versus 21.68 km). This indicates that clinics seem to  
242 play as a comparable role to hospitals which typically offer more advanced devices  
243 and a greater number of specialists in this study. This counter-intuitive finding could  
244 be attributed to Taiwan government's promotion of diabetic care utilization in clinics.  
245 According to national statistics, diabetic treatment in outpatient care has been evenly  
246 distributed among clinics, hospitals, and medical centers since 2009[4]. Additionally,  
247 nationwide studies in Taiwan have indicated a reduction in the rural-urban disparity in

248 diabetic care at primary health units[11, 20], reflecting effective public health  
249 strategies to enhance accessibility and care continuity for rural populations.  
250  
251 In addition to spatial factors, our study also examined social and biochemical  
252 determinants that may influence glycemic control. Notably, nearly half of the study's  
253 participants were elderly, double the proportion of geriatric individuals in the global  
254 diabetic population[21]. Aging population rises a concern that healthcare providers in  
255 rural region need to pay more attention to geriatric complications. Furthermore, the  
256 majority of our subjects had an education level below junior high school. Low  
257 educational attainment has been linked to increased risks of developing conditions  
258 such as coronary heart disease, chronic kidney disease, and diabetic foot[22-24].  
259 Comorbidities such as hypertension and cardiovascular diseases were prevalent  
260 among our subjects, aligning with findings from previous rural studies in Taiwan that  
261 reported a 12% higher risk of cardiovascular events compared to the urban diabetic  
262 population[5].  
263  
264 Our logistic regression analysis identified several variables associated with better  
265 glycemic control ( $HbA1c < 7\%$ ). Not-working status seemed to be a protective factor  
266 against chronic glycemia. In rural settings, non-working individuals were often

267 retirees or homemakers who may have more time to engage in health-promoting  
268 activities such as exercising, maintaining healthy diets, and participating in health  
269 education programs at medical facilities. Another key finding was that T2DM patients  
270 living in Shan-Lin district were more likely to experience good glycemic control.  
271 Given that Shan-Lin district is closer to the hospital and downtown compared to Jia-  
272 Sian, this could suggest a link between proximity to healthcare resources and long-  
273 term glycemic control. However, further qualitative study is needed to explore other  
274 socio-economic factors that might influence this association. Additionally, achieving  
275 goals for fasting glucose and HDL-C were both positively correlated with controlled  
276 HbA1c levels. Previous studies have documented the close relationship between  
277 fasting glucose levels and HbA1c[25, 26]. Moreover, HDL dysfunction has been  
278 shown to adversely affect pancreatic  $\beta$ -cell function and insulin sensitivity in muscle  
279 tissues[27], which may exacerbate the progression of T2DM[28]. In rural diabetic  
280 care, healthcare providers often face challenges in regularly assessing patients' HbA1c  
281 levels. Recognizing the factors discussed above can be beneficial in evaluating  
282 patients' long-term glycemic status and tailoring appropriate interventions. This  
283 holistic approach is essential for improving diabetes management and outcomes in  
284 rural populations.  
285

286 This study has several limitations that warrant consideration. Firstly, the relatively  
287 small sample size of T2DM patients may lead to wide confidence intervals of odds  
288 ratio in the logistic regression analysis. This limitation likely arises from the stringent  
289 inclusion criteria that subjects have HbA1c values measured within three months of  
290 their initial visit to the Mobile Health Care outpatient service. To more precisely  
291 determine the influence among factors on glycemic control, larger cohort studies are  
292 necessary. Secondly, some critical factors that may be related to glycemic control,  
293 such as body mass index, duration of T2DM, marital status, and income, were not  
294 available in this retrospective study. The absence of these variables could limit the  
295 comprehensiveness and accuracy of our findings. Thirdly, distance calculated by  
296 Google Maps from a patient's address to the nearest medical unit may not perfectly  
297 reflect geographic accessibility. Patients may choose different routes or utilize various  
298 transportation to medical units, introducing variability that could reduce the precision  
299 of the estimates. However, given the paucity of medical facilities and inconvenient  
300 public transportation in the rural areas studied, assuming that the distance to the  
301 nearest clinic or hospital reasonably represents the geographic burden faced by  
302 patients in accessing diabetic care remains a practical and justified approach.

303

## 304 **Conclusion**

305 This study highlights the influence of geographic accessibility and socio-economic  
306 factors on long-term glycemic control in rural diabetic patients in Taiwan. By  
307 demonstrating a positive correlation between distance to medical facilities and HbA1c  
308 levels, our findings suggest that patients residing further from healthcare resources  
309 tend to experience poorer glycemic control. This geographical challenge underscores  
310 the necessity for policy makers to consider distance as a significant factor in rural  
311 diabetes management. Moreover, our research identifies several indicators such as  
312 control of fasting glucose and lipid profiles, employment status, and address district  
313 that can help rural physicians rapidly assess potential long-term glycemic control  
314 upon a patient's initial presentation.

315

316 In conclusion, this study offers valuable insights of glycemic control for rural  
317 healthcare providers and policy makers, underscoring the need for targeted  
318 interventions to improve access to diabetic care in rural areas, such as mobile health  
319 services and community-based health education programs. This research also calls for  
320 larger-scale studies to further investigate the causal relationships and to explore  
321 additional factors affecting glycemic control in rural diabetic population, which could  
322 inform policy and healthcare strategies tailored to these communities.

323

## 324 **Acknowledgements**

325 The authors would like to express gratitude to medical team of Mobile Health Care  
326 for collecting subjects' profiles and appreciate the Biostatistics Center, Kaohsiung  
327 Chang Gung Memorial Hospital for statistics work.

328

## 329 **Reference**

- 330 1. International Diabetes Federation. IDF Diabetes Atlas, 10th edn. Brussels,  
331 Belgium: 2021. Available from: <https://www.diabetesatlas.org>.
- 332 2. Sheen YJ, Hsu CC, Jiang YD, Huang CN, Liu JS, Sheu WH. Trends in  
333 prevalence and incidence of diabetes mellitus from 2005 to 2014 in Taiwan. J Formos  
334 Med Assoc. 2019;118 Suppl 2:S66-s73. Epub 20190709. doi:  
335 10.1016/j.jfma.2019.06.016. PubMed PMID: 31300322.
- 336 3. Bommer C, Heesemann E, Sagalova V, Manne-Goehler J, Atun R, Bärnighausen  
337 T, et al. The global economic burden of diabetes in adults aged 20-79 years: a cost-of-  
338 illness study. Lancet Diabetes Endocrinol. 2017;5(6):423-30. Epub 20170426. doi:  
339 10.1016/s2213-8587(17)30097-9. PubMed PMID: 28456416.
- 340 4. Wang CY, Wu YL, Sheu WH, Tu ST, Hsu CC, Tai TY. Accountability and  
341 utilization of diabetes care from 2005 to 2014 in Taiwan. J Formos Med Assoc.  
342 2019;118 Suppl 2:S111-S21. Epub 20191004. doi: 10.1016/j.jfma.2019.08.010.  
343 PubMed PMID: 31590971.
- 344 5. Tai SY, He JS, Kuo CT, Kawachi I. Urban-Rural Disparities in the Incidence of  
345 Diabetes-Related Complications in Taiwan: A Propensity Score Matching Analysis. J  
346 Clin Med. 2020;9(9). Epub 20200918. doi: 10.3390/jcm9093012. PubMed PMID:  
347 32962006; PubMed Central PMCID: PMC7565280.
- 348 6. Chatterjee S, Davies MJ, Heller S, Speight J, Snoek FJ, Khunti K. Diabetes  
349 structured self-management education programmes: a narrative review and current  
350 innovations. Lancet Diabetes Endocrinol. 2018;6(2):130-42. Epub 20170929. doi:  
351 10.1016/s2213-8587(17)30239-5. PubMed PMID: 28970034.
- 352 7. Dugani SB, Mielke MM, Vella A. Burden and management of type 2 diabetes in  
353 rural United States. Diabetes Metab Res Rev. 2021;37(5):e3410. Epub 20201005. doi:  
354 10.1002/dmrr.3410. PubMed PMID: 33021052; PubMed Central PMCID:  
355 PMCPMC7990742.

- 356 8. Wang Q, Zhang X, Fang L, Guan Q, Guan L, Li Q. Prevalence, awareness,  
357 treatment and control of diabetes mellitus among middle-aged and elderly people in a  
358 rural Chinese population: A cross-sectional study. *PLoS One*. 2018;13(6):e0198343.  
359 Epub 20180601. doi: 10.1371/journal.pone.0198343. PubMed PMID: 29856828;  
360 PubMed Central PMCID: PMC5983453.
- 361 9. Li CH, Li CC, Lu CL, Wu JS, Ku LE, Li CY. Urban-rural disparity in lower  
362 extremities amputation in patients with diabetes after nearly two decades of universal  
363 health insurance in Taiwan. *BMC Public Health*. 2020;20(1):212. Epub 20200211.  
364 doi: 10.1186/s12889-020-8335-3. PubMed PMID: 32046698; PubMed Central  
365 PMCID: PMC7014711.
- 366 10. Lee CM, Chang CC, Pan MY, Chang CF, Chen MY. Insufficient early detection  
367 of peripheral neurovasculopathy and associated factors in rural diabetes residents of  
368 Taiwan: a cross-sectional study. *BMC Endocr Disord*. 2014;14:89. Epub 20141124.  
369 doi: 10.1186/1472-6823-14-89. PubMed PMID: 25421066; PubMed Central PMCID:  
370 PMC4255455.
- 371 11. Chen CC, Chen LW, Cheng SH. Rural-urban differences in receiving guideline-  
372 recommended diabetes care and experiencing avoidable hospitalizations under a  
373 universal coverage health system: evidence from the past decade. *Public Health*.  
374 2017;151:13-22. Epub 20170708. doi: 10.1016/j.puhe.2017.06.009. PubMed PMID:  
375 28697373.
- 376 12. Biswas RK, Kabir E. Influence of distance between residence and health  
377 facilities on non-communicable diseases: An assessment over hypertension and  
378 diabetes in Bangladesh. *PLoS One*. 2017;12(5):e0177027. Epub 20170518. doi:  
379 10.1371/journal.pone.0177027. PubMed PMID: 28545074; PubMed Central PMCID:  
380 PMC5436657.
- 381 13. Fukuoka R, Takeda M, Abe T, Yamasaki M, Kimura S, Okuyama K, et al.  
382 Inconvenience of Living Place Affects Individual HbA1c Level in a Rural Area in  
383 Japan: Shimane CoHRE Study. *Int J Environ Res Public Health*. 2021;18(3). Epub  
384 20210128. doi: 10.3390/ijerph18031147. PubMed PMID: 33525428; PubMed Central  
385 PMCID: PMC7908499.
- 386 14. LePage AK, Wise JB, Bell JJ, Tumin D, Smith AW. Distance from the  
387 endocrinology clinic and diabetes control in a rural pediatric population. *J Pediatr  
388 Endocrinol Metab*. 2021;34(2):187-93. Epub 20201012. doi: 10.1515/jpem-2020-  
389 0332. PubMed PMID: 33544546.
- 390 15. Nouhjah S, Shahbazian H, Jahanfar S, Shahbazian N. The effect of distance on  
391 the adherence to postpartum follow-up in women with gestational diabetes. *Environ  
392 Sci Pollut Res Int*. 2021;28(46):65428-34. Epub 20210728. doi: 10.1007/s11356-021-  
393 15472-3. PubMed PMID: 34318425.



- 394 16. Strauss K, MacLean C, Troy A, Littenberg B. Driving distance as a barrier to  
395 glycemic control in diabetes. *J Gen Intern Med.* 2006;21(4):378-80. doi:  
396 10.1111/j.1525-1497.2006.00386.x. PubMed PMID: 16686817; PubMed Central  
397 PMCID: PMCPMC1484707.
- 398 17. ElSayed NA, Aleppo G, Aroda VR, Bannuru RR, Brown FM, Bruemmer D, et  
399 al. 2. Classification and Diagnosis of Diabetes: Standards of Care in Diabetes-2023.  
400 *Diabetes Care.* 2023;46(Supplement\_1):S19-s40. doi: 10.2337/dc23-S002. PubMed  
401 PMID: 36507649.
- 402 18. *DAROC Clinical Practice Guidelines for Type 2 Diabetes Care- 2022*, Taiwan,  
403 Diabetes Association of the R.O.C., 2022.
- 404 19. Zgibor JC, Gieraltowski LB, Talbott EO, Fabio A, Sharma RK, Hassan K. The  
405 association between driving distance and glycemic control in rural areas. *J Diabetes*  
406 *Sci Technol.* 2011;5(3):494-500. Epub 20110501. doi:  
407 10.1177/193229681100500304. PubMed PMID: 21722565; PubMed Central PMCID:  
408 PMCPMC3192616.
- 409 20. Cheng BR, Chang HT, Lin MH, Chen TJ, Chou LF, Hwang SJ. Rural-urban  
410 disparities in family physician practice patterns: A nationwide survey in Taiwan. *Int J*  
411 *Health Plann Manage.* 2019;34(1):e464-e73. Epub 20180920. doi: 10.1002/hpm.2662.  
412 PubMed PMID: 30238506.
- 413 21. International Diabetes Federation (IDF) (2015) *Diabetes Atlas*. 7th Edition,  
414 International Diabetes Federation, Brussels, Belgium. Available from:  
415 <http://www.diabetesatlas.org>.
- 416 22. Pourkazemi A, Ghanbari A, Khojamli M, Balo H, Hemmati H, Jafaryparvar Z, et  
417 al. Diabetic foot care: knowledge and practice. *BMC Endocr Disord.* 2020;20(1):40.  
418 Epub 20200320. doi: 10.1186/s12902-020-0512-y. PubMed PMID: 32192488;  
419 PubMed Central PMCID: PMCPMC7083045.
- 420 23. Mizouri R, Belhadj M, Hasni Y, Maaroufi A, Mahjoub F, Jamoussi H.  
421 Relationship between level of education and podiatry risk in diabetic patients. *Tunis*  
422 *Med.* 2021;99(2):277-84. PubMed PMID: 33899199; PubMed Central PMCID:  
423 PMCPMC8636960.
- 424 24. Slåtve KB, Claudi T, Lappegård KT, Jennum AK, Larsen M, Nøkleby K, et al.  
425 Level of education is associated with coronary heart disease and chronic kidney  
426 disease in individuals with type 2 diabetes: a population-based study. *BMJ Open*  
427 *Diabetes Res Care.* 2022;10(5). doi: 10.1136/bmjdr-2022-002867. PubMed PMID:  
428 36171015; PubMed Central PMCID: PMCPMC9528574.
- 429 25. Ghazanfari Z, Haghdoost AA, Alizadeh SM, Atapour J, Zolala F. A Comparison  
430 of HbA1c and Fasting Blood Sugar Tests in General Population. *Int J Prev Med.*  
431 2010;1(3):187-94. PubMed PMID: 21566790; PubMed Central PMCID:

432 PMCPMC3075530.

433 26. Mayega RW, Guwatudde D, Makumbi FE, Nakwagala FN, Peterson S, Tomson  
434 G, et al. Comparison of fasting plasma glucose and haemoglobin A1c point-of-care  
435 tests in screening for diabetes and abnormal glucose regulation in a rural low income  
436 setting. *Diabetes Res Clin Pract.* 2014;104(1):112-20. Epub 20140103. doi:  
437 10.1016/j.diabres.2013.12.030. PubMed PMID: 24456993.

438 27. Rotllan N, Julve J, Escolà-Gil JC. Type 2 Diabetes and HDL dysfunction: a key  
439 contributor to Glycemic Control. *Curr Med Chem.* 2023. Epub 20230201. doi:  
440 10.2174/0929867330666230201124125. PubMed PMID: 36722477.

441 28. Waldman B, Jenkins AJ, Sullivan D, Ng MKC, Keech AC. HDL as a Target for  
442 Glycemic Control. *Curr Drug Targets.* 2017;18(6):651-73. doi:  
443 10.2174/1389450116666150727115544. PubMed PMID: 26212264.

444

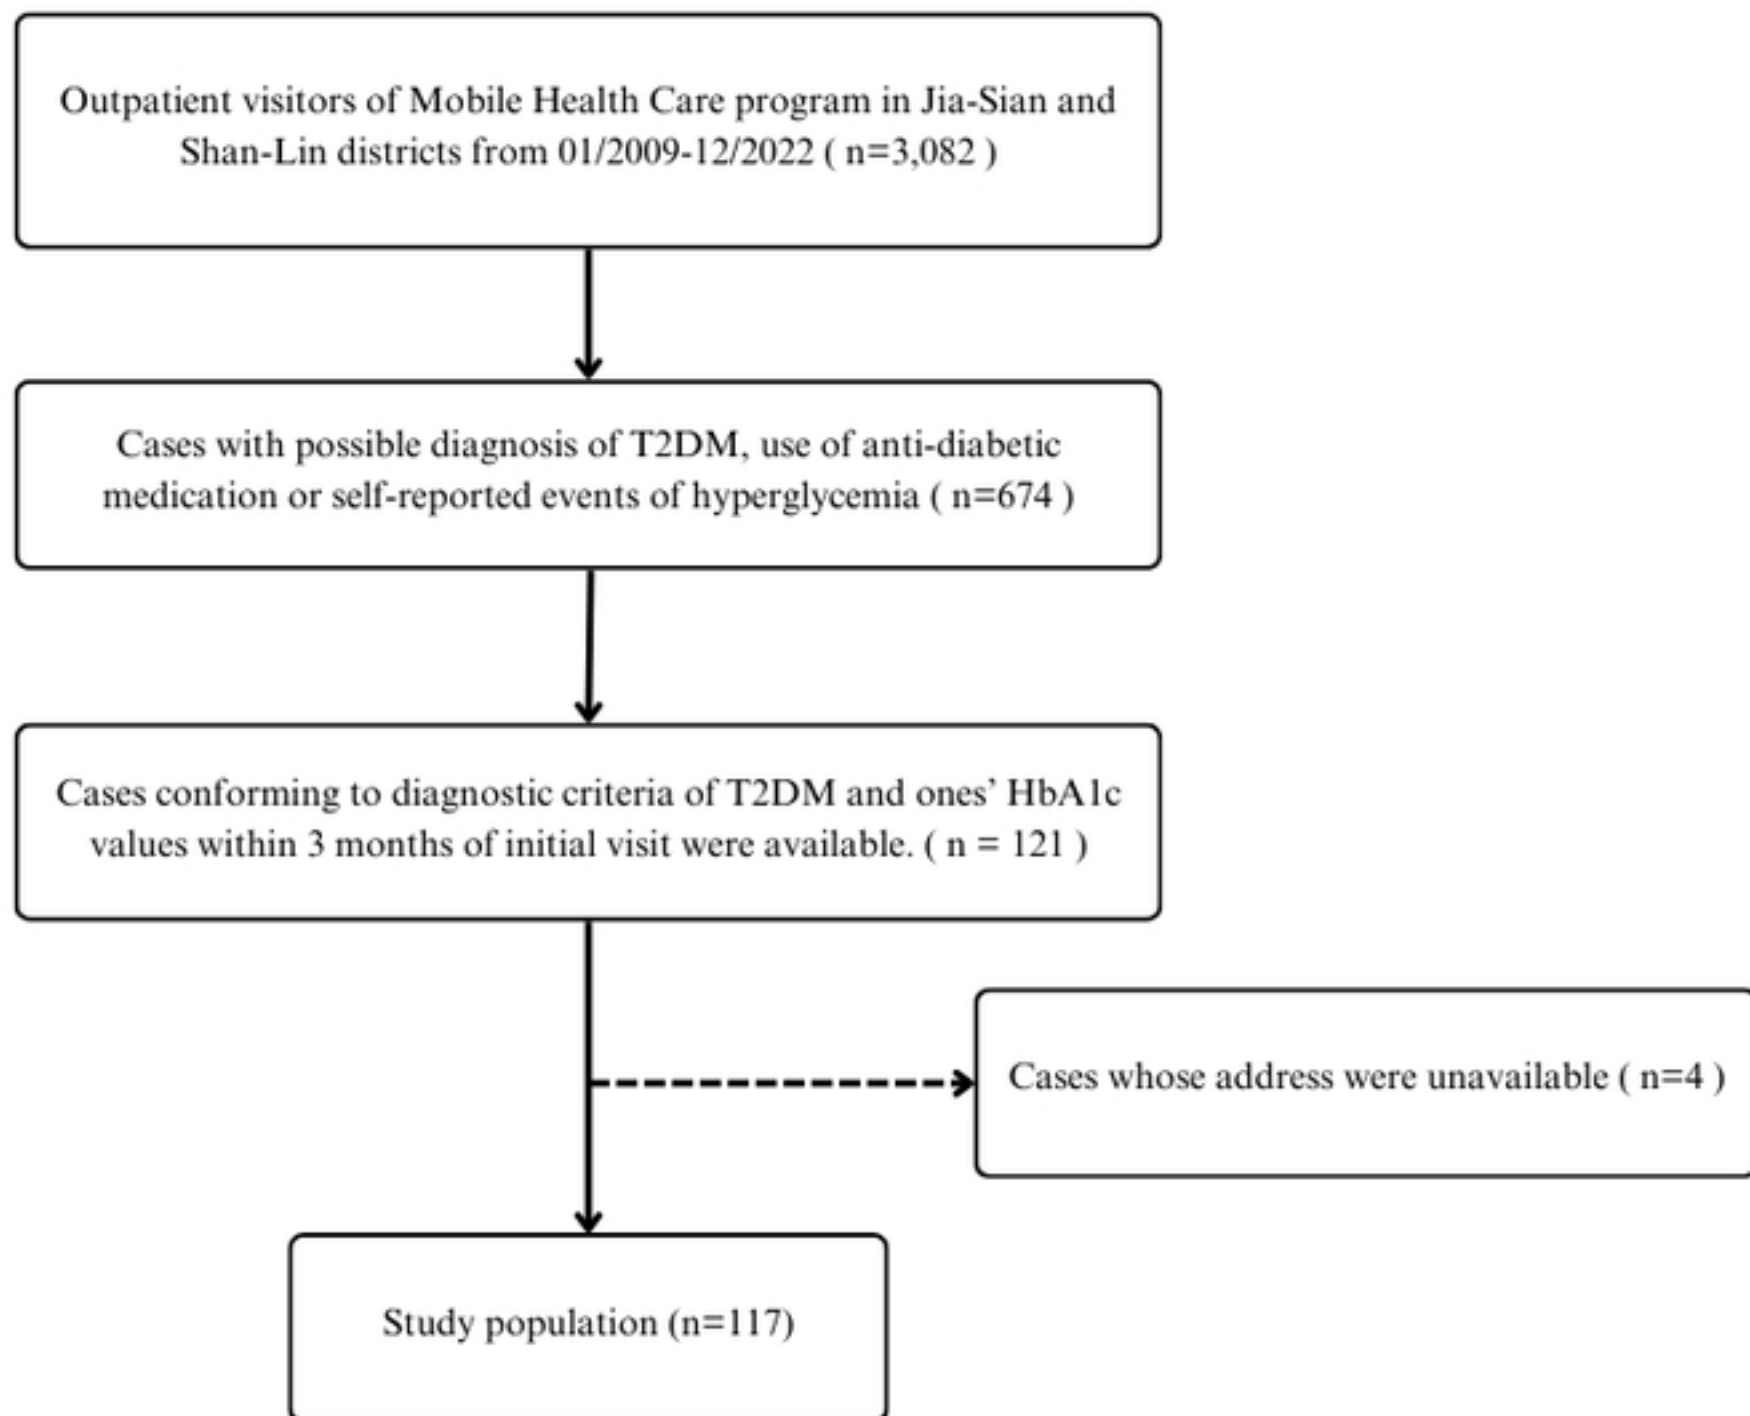

Figure
